# Supplementary material for: Metamorphosis of memory circuits in Drosophila reveals a strategy for evolving a larval brain
Source: eLife. 2023 Jan 25;12:e80594. doi: 10.7554/eLife.80594 (PMC9984194; doi:10.7554/eLife.80594)
Supplement: Figure 2—source data 6. [file elife-80594-fig2-data6.xlsx]

## Sheet: Sheet1
Larval Cell	Driver Line	# brains examined	# with adult version
MBIN-b1,b2	JRC_SS21716	4	4
DAN-c1	JRC_MB586B	4	4
DAN-d1	JRC-MB328B	3	3
MBIN-l1 [MBIN-d1] (1,2)	JRC_SS04484	2	2
MBIN-l1 [MBIN-d1] (1,2)	JRC_SS01624	2	1
OAN-e1	JRC_SS01958	4	3
OAN-e1; DAN c1	JRC_SS01702	3	3 (OAN-e1); 1 (DAN-c1)
DAN-f1	JRC_MB065b	2	1
DAN-f1	JRC_MB145	4	2
DAN-g1	JRC_SS01716	2	1
DAN-g1	JRC_SS01755	5	2
OAN-g1	JRC_SS04268	1	1
OAN-g1	JRC_25844	3	1
DAN-h1	JRC_MB440B	3	0
DAN-i1	JRC_MB196c;	5	0
DAN-i1, h1, j1	JRC_SS01949	5	0
DAN-j1	JRC_MB316B	3	0
DAN-j1	JRC_MB340c	4	0
DAN-k1	JRC_MB198B	3	0
DAN-k1	JRC_SS01757	5	0
MBON-a1	JRC_SS01417	4	4 (MBON-a1); 1 (MBON-a2)
MBON-a1	JRC_SS00867	3	3
MBON-a2	JRC_SS00872	4	1
MBON-a2	JRC_SS02006	3	2
MBON-b1,b2	JRC_SS01708	3	3
MBON-b1,b2	JRC_SS01959	3	2
MBON-d1	JRC_SS01705	2	2
MBON-e2	JRC_SS04172	2	1
MBON-f2	JRC_SS04328	3	3
MBON-g1,g2	JRC_SS02130;	4	4
MBON-g1,g2	JRC_SS02121	4	3
MBON-h1,h2	JRC_SS01725	4	4
MBON-i1	JRC_04236	5	2
MBON-i1, MBON-k1	JRC_SS01962	3	3 (MBON-i1), 1 (MBON-k1)
MBON-j1	JRC_SS01973	5	5
MBON-j2	JRC_SS00860	3	3
APL	JRC_SS01671	5	5
